# Supplementary material for: Photon-driven bactericidal performance of surface-modified TiO2 nanofibers
Source: Royal Society of Chemistry journal article supplement (doi:10.1039/d3tc00473b), 2023-01-01

## Supporting Information

### Photon-driven Bactericidal performance of surface-modified TiO<sub>2</sub> nanofibers

Mina Shahriari-Khalaji,<sup>a</sup> Fatemeh Zabihi,<sup>a</sup> Addie Bahi,<sup>b</sup> Dušan Sredojević,<sup>c,d</sup> Jovan M. Nedeljković,<sup>c</sup> Daniel K. Macharia,<sup>a</sup> Matteo Ciprian,<sup>a</sup> Shengyuan Yang,<sup>a\*</sup> Frank Ko<sup>b\*\*</sup>

<sup>a</sup>State Key Laboratory for Modification of Chemical Fibers and Polymer Materials, International Joint Laboratory for Advanced Fiber and Low-Dimension Materials, College of Materials Science and Engineering, Donghua University, Shanghai 201620, China.

<sup>b</sup>Department of Materials Engineering, the University of British Columbia, Vancouver, BC, V6T 1Z4, Canada.

<sup>c</sup>Vinča Institute of Nuclear Sciences – National Institute of the Republic of Serbia, University of Belgrade, Centre of Excellence for Photoconversion, P.O. Box 522, 11001 Belgrade, Serbia.

<sup>d</sup>Texas A&M University at Qatar, P.O. Box 23874, Doha, Qatar.

\* Corresponding author. E-mail address: cmseysy@dhu.edu.cn (Shengyuan Yang); frank.ko@ubc.ca (Frank Ko).

Supporting Information 1. The EDS mapping of oxygen for G-TiO<sub>2</sub> NFs (A) and G-TiO<sub>2</sub>/RhA NFs (B).

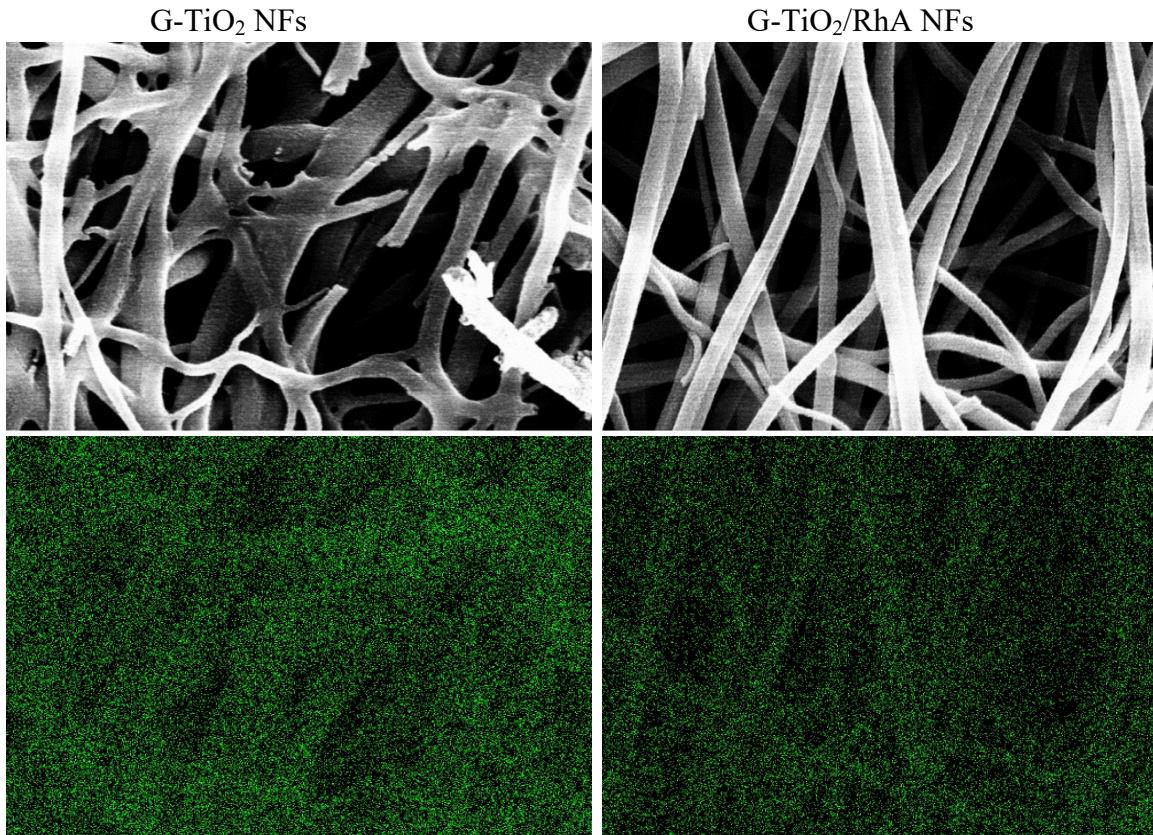

Supporting Information 2. (A) FTIR and (B) Absorbance spectra of G-TiO<sub>2</sub> NFs and G-TiO<sub>2</sub>/RhA NFs.

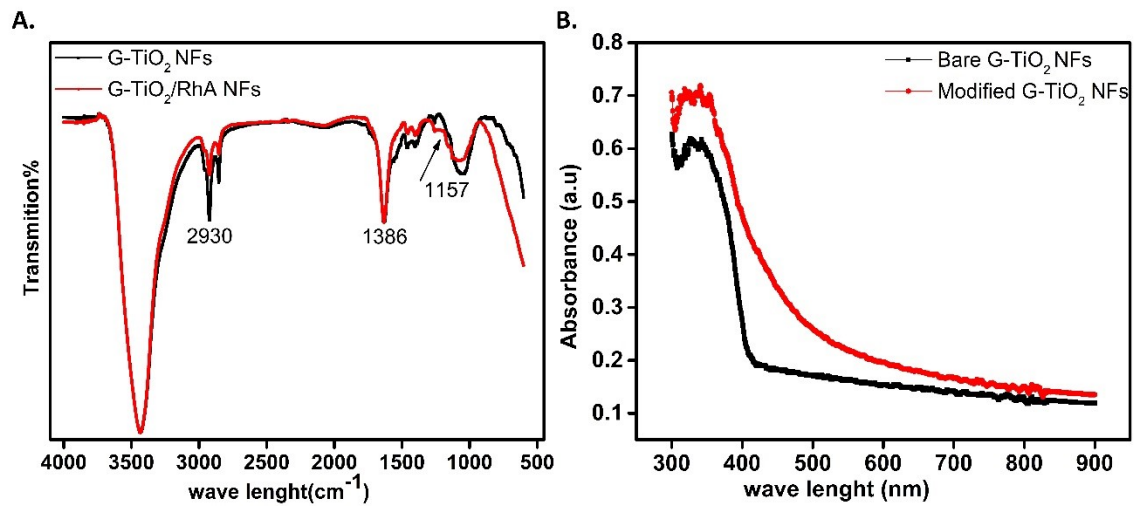

Supporting Information 3. Optimized geometry of the  $[\text{Ti}_{18}\text{O}_{31}(\text{OH})_8]/\text{RhA}$  cluster.

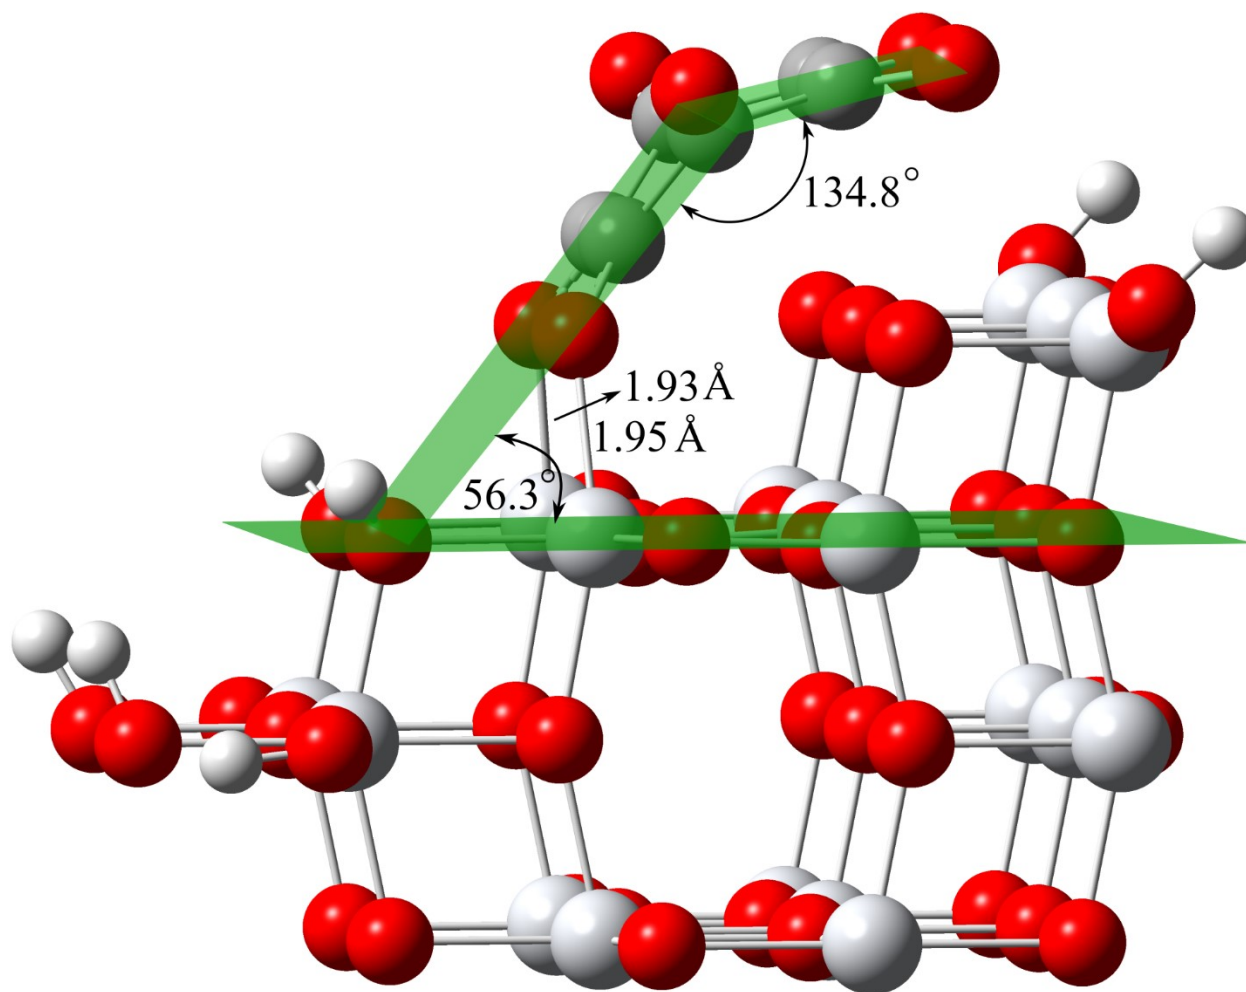

Supplement: d3tc00473b1.pdf [file d3tc00473b1.pdf]
